# Supplementary material for: Computer-aided screening of bismuth molybdates nonlinear optical crystals γ -Bi 2 MoO 6
Source: Royal Society of Chemistry journal article supplement (doi:10.1039/d4qi01781a), 2024-01-01
Supplement: d4qi01781a1.pdf [file d4qi01781a1.pdf]

## Supporting Information For

# Computer-Aided Screening of Bismuth Molybdates Nonlinear Optical Crystals $\gamma$ -Bi<sub>2</sub>MoO<sub>6</sub>

Xuefan Wang, Yan Xiao, Wenjing Tan, Hongbo Huang, Daqing Yang, Ying Wang, Bingbing Zhang\*

College of Chemistry and Environmental Science, Key Laboratory of Medicinal Chemistry and Molecular Diagnosis of the Ministry of Education, Key Laboratory of Analytical Science and Technology of Hebei Province, Hebei University, Baoding 071002, China.

Corresponding Author Bingbing Zhang

Email: zhangbb@hbu.edu.cn

**Table S1.** The chemical formula, ICSD collection-code, space group, band gap ( $E_g$ ), birefringence ( $\Delta n$ ), second-order susceptibility ( $\chi^{(2)}$ ), and the maximum  $\chi^{(2)}$  tensor of 5 bismuth molybdates.

**Table S2.** Calculation of dipole moments of the Mo-O and Bi-O Polyhedra for  $\gamma$ -Bi<sub>2</sub>MoO<sub>6</sub>.

**Table S3.** Calculation of dipole moments of the Mo-O and Bi-O Polyhedra for Bi<sub>10</sub>Mo<sub>3</sub>O<sub>24</sub>.

**Figure S1.** The Mo respective coordination polyhedra of  $\gamma$ -Bi<sub>2</sub>MoO<sub>6</sub> (a) and Bi<sub>10</sub>Mo<sub>3</sub>O<sub>24</sub> (b).

**Figure S2.** The Bi respective coordination polyhedra of  $\gamma$ -Bi<sub>2</sub>MoO<sub>6</sub>, with purple arrows indicating the directions of the group's dipole moments.

**Figure S3.** The Bi respective coordination polyhedra of Bi<sub>10</sub>Mo<sub>3</sub>O<sub>24</sub>, with purple arrows indicating the directions of the group's dipole moments.

**Figure S4.** The [Bi<sub>10</sub>O<sub>12</sub>]<sub>n</sub> layer (a). The ten-membered ring channels (b). Projection of Bi<sub>10</sub>Mo<sub>3</sub>O<sub>24</sub> refined crystal structure on to (010) plane (c).

**Figure S5.** The dipole moment directions generated by the asymmetric Bi-O groups in  $\gamma$ -Bi<sub>2</sub>MoO<sub>6</sub> (a) and Bi<sub>10</sub>Mo<sub>3</sub>O<sub>24</sub> (b). ( $\gamma$ -Bi<sub>2</sub>MoO<sub>6</sub> is along the c-axis, Bi<sub>10</sub>Mo<sub>3</sub>O<sub>24</sub> is along the b-axis.)

**Figure S6.** The TG-DSC curves of  $\gamma$ -Bi<sub>2</sub>MoO<sub>6</sub> (a) and Bi<sub>10</sub>Mo<sub>3</sub>O<sub>24</sub> (c). The XRD patterns of the  $\gamma$ -Bi<sub>2</sub>MoO<sub>6</sub> (b) and Bi<sub>10</sub>Mo<sub>3</sub>O<sub>24</sub> (d) samples obtained at different calcination temperatures.

**Figure S7.** The infrared vibration mode of  $\gamma$ -Bi<sub>2</sub>MoO<sub>6</sub>.

**Figure S8.** The infrared vibration mode of Bi<sub>10</sub>Mo<sub>3</sub>O<sub>24</sub>.

**Figure S9.** The bandgap of  $\gamma$ -Bi<sub>2</sub>MoO<sub>6</sub> calculated using the HSE06 method.

**Figure S10.** Partial DOSs of Bi1-Bi5 atoms from Bi<sub>10</sub>Mo<sub>3</sub>O<sub>24</sub> (a). The ELF of Bi<sub>10</sub>Mo<sub>3</sub>O<sub>24</sub> (b). The ELF for five independent Bi atoms in Bi<sub>10</sub>Mo<sub>3</sub>O<sub>24</sub> (c).

**Figure S11.** SHG density maps of occupied orbitals of the largest SHG coefficient  $d_{24}$  of  $\gamma$ -Bi<sub>2</sub>MoO<sub>6</sub> in different density color scale.

**Figure S12.** SHG density maps of occupied and unoccupied orbitals of the largest SHG coefficient  $d_{22}$  for Bi<sub>10</sub>Mo<sub>3</sub>O<sub>24</sub>.

**Table S1.** The chemical formula, ICSD collection-code, space group, band gap (Eg), birefringence ( $\Delta n$ ), second-order susceptibility ( $\chi^{(2)}$ ), and the maximum  $\chi^{(2)}$  tensor of 5 bismuth molybdates.

| No. | Formula                                              | ICSD   | Space groups      | Eg-GGA(eV) | $\Delta n$ | $\chi^{(2)}$ (pm/V)                                                                                         | $ \chi^{(2)} _{\max}$ (pm/V) |
|-----|------------------------------------------------------|--------|-------------------|------------|------------|-------------------------------------------------------------------------------------------------------------|------------------------------|
| 1   | Bi <sub>2</sub> MoO <sub>6</sub>                     | 47139  | Pca2 <sub>1</sub> | 1.246      | 0.345      | $\chi_{113}=-48.40$ ; $\chi_{223}=125.05$ ;<br>$\chi_{333}=95.38$                                           | 125.05                       |
| 2   | Bi <sub>2</sub> MoO <sub>6</sub>                     | 201685 | Pca2 <sub>1</sub> | 1.251      | 0.354      | $\chi_{113}=-48.54$ ; $\chi_{223}=124.85$ ;<br>$\chi_{333}=94.79$                                           | 124.85                       |
| 3   | Bi <sub>2</sub> MoO <sub>6</sub>                     | 14266  | Pca2 <sub>1</sub> | 1.238      | 0.356      | $\chi_{113}=-50.31$ ; $\chi_{223}=124.58$ ;<br>$\chi_{333}=94.92$                                           | 124.58                       |
| 4   | Bi <sub>10</sub> Mo <sub>3</sub> O <sub>24</sub>     | 262963 | C2                | 1.939      | 0.089      | $\chi_{112}=-10.00$ ; $\chi_{123}=16.41$ ;<br>$\chi_{222}=10.19$ ; $\chi_{233}=11.43$                       | 16.41                        |
| 5   | Bi <sub>10</sub> Mo <sub>3</sub> O <sub>24</sub>     | 173837 | C2                | 1.948      | 0.079      | $\chi_{112}=-9.67$ ; $\chi_{123}=16.16$ ;<br>$\chi_{222}=8.41$ ; $\chi_{233}=9.99$                          | 16.16                        |
| 6   | Bi <sub>14</sub> Mo <sub>5</sub> O <sub>36</sub>     | 262964 | C2                | 1.689      | 0.186      | $\chi_{112}=0.06$ ; $\chi_{123}=-9.85$ ;<br>$\chi_{222}=2.80$ ; $\chi_{233}=0.71$                           | 9.85                         |
| 7   | Cs <sub>2</sub> NaBi(MoO <sub>4</sub> ) <sub>3</sub> | 428061 | R3c               | 2.475      | 0.042      | $\chi_{113}=2.96$ ; $\chi_{122}=0.52$ ; $\chi_{222}=-$<br>$0.02$ ; $\chi_{223}=2.96$ ; $\chi_{333}=-3.50$ ; | 3.50                         |
| 8   | Cs <sub>5</sub> Bi(MoO <sub>4</sub> ) <sub>4</sub>   | 20845  | Cc                | 2.838      | 0.022      | $\chi_{111}=0.45$ ; $\chi_{113}=0.50$ ; $\chi_{122}=-$<br>$0.41$ ; $\chi_{223}=-0.09$ ; $\chi_{333}=-1.54$  | 1.54                         |

**Table S2.** Calculation of dipole moments of the Mo-O and Bi-O Polyhedra for  $\gamma$ -Bi<sub>2</sub>MoO<sub>6</sub>

|                                            | Species             | Symmetry code of cations     | dipole moment |              |              |           |                                            |       |
|--------------------------------------------|---------------------|------------------------------|---------------|--------------|--------------|-----------|--------------------------------------------|-------|
|                                            |                     |                              | <i>x (a)</i>  | <i>y (b)</i> | <i>z (c)</i> | magnitude |                                            |       |
|                                            |                     |                              |               |              |              | debye     | $\times 10^{-18}$<br>esu·cm/Å <sup>3</sup> |       |
| $\gamma$ -Bi <sub>2</sub> MoO <sub>6</sub> | Mo(1)O <sub>6</sub> | 1+x, y, 1+z                  | 0.053         | -2.657       | 7.505        | 7.962     | 0.016                                      |       |
|                                            |                     | 1/2-x, y, 1/2+z              | -0.054        | -2.658       | 7.506        | 7.963     | 0.016                                      |       |
|                                            |                     | 1-x, 1-y, 1/2+z              | -0.054        | 2.659        | 7.504        | 7.961     | 0.016                                      |       |
|                                            |                     | 1/2+x, 1-y, 1+z              | 0.056         | 2.663        | 7.508        | 7.967     | 0.016                                      |       |
|                                            |                     | $\Sigma$ Mo(1)O <sub>6</sub> | 0.001         | 0.007        | 30.024       | 30.036    | 0.061                                      |       |
|                                            | Bi(1)O <sub>6</sub> | 3/2-x, y, -1/2+z             | -8.930        | 13.602       | -6.180       | 17.405    | 0.036                                      |       |
|                                            |                     | x,y,z                        | 8.931         | 13.600       | -6.177       | 17.404    | 0.036                                      |       |
|                                            |                     | 1-x, 1-y, -1/2+z             | -8.932        | -13.601      | -6.179       | 17.405    | 0.036                                      |       |
|                                            |                     | -1/2+x, 1-y, z               | 8.934         | -13.600      | -6.180       | 17.406    | 0.036                                      |       |
|                                            |                     | $\Sigma$ Bi(1)O <sub>6</sub> | 0.003         | 0.001        | -24.717      | 24.710    | 0.050                                      |       |
|                                            | Bi(2)O <sub>6</sub> | x,y,z                        | -4.588        | -12.895      | -6.288       | 15.062    | 0.031                                      |       |
|                                            |                     | 1/2-x, y, -1/2+z             | 4.590         | -12.894      | -6.286       | 15.061    | 0.031                                      |       |
|                                            |                     | 1/2+x, 1-y, z                | -4.585        | 12.895       | -6.287       | 15.061    | 0.031                                      |       |
|                                            |                     | 1-x, 1-y, -1/2+z             | 4.588         | 12.895       | -6.287       | 15.062    | 0.031                                      |       |
|                                            |                     | $\Sigma$ Bi(2)O <sub>6</sub> | 0.004         | 0.001        | -25.149      | 25.140    | 0.051                                      |       |
|                                            |                     | $\Sigma$ Bi-O                | /             | 0.008        | 0.003        | -49.866   | 49.850                                     | 0.102 |
|                                            |                     | Unit cell                    |               | 0.009        | 0.009        | -19.842   | 19.813                                     | 0.040 |

**Table S3.** Calculation of dipole moments of the Mo-O and Bi-O Polyhedra for Bi<sub>10</sub>Mo<sub>3</sub>O<sub>24</sub>

|                                                  | Species                      | Symmetry code of cations     | dipole moment |              |              |           |                                            |       |
|--------------------------------------------------|------------------------------|------------------------------|---------------|--------------|--------------|-----------|--------------------------------------------|-------|
|                                                  |                              |                              | <i>x (a)</i>  | <i>y (b)</i> | <i>z (c)</i> | magnitude |                                            |       |
|                                                  |                              |                              |               |              |              | debye     | $\times 10^{-18}$<br>esu·cm/Å <sup>3</sup> |       |
| Bi <sub>10</sub> Mo <sub>3</sub> O <sub>24</sub> | Mo(1)O <sub>4</sub>          | 1-x, y, 1-z                  | 5.082         | -1.940       | -1.972       | 5.961     | 0.005                                      |       |
|                                                  |                              | x, y, z                      | -5.085        | -1.937       | 1.970        | 5.962     | 0.005                                      |       |
|                                                  |                              | 1/2+x, 1/2+y, z              | -5.083        | -1.938       | 1.973        | 5.962     | 0.005                                      |       |
|                                                  |                              | 1/2-x, 1/2+y, 1-z            | 5.082         | -1.941       | -1.972       | 5.961     | 0.005                                      |       |
|                                                  |                              | $\Sigma$ Mo(1)O <sub>4</sub> | -0.004        | -7.757       | -0.001       | 7.766     | 0.007                                      |       |
|                                                  | Mo(2)O <sub>4</sub>          | 1+x, y, 1+z                  | -0.002        | -1.716       | -0.001       | 1.716     | 0.001                                      |       |
|                                                  |                              | 1/2+x, 1/2+y, 1+z            | -0.001        | -1.714       | 0.000        | 1.714     | 0.001                                      |       |
|                                                  |                              | $\Sigma$ Mo(2)O <sub>4</sub> | -0.004        | -3.430       | -0.001       | 3.438     | 0.003                                      |       |
|                                                  |                              | $\Sigma$ Mo-O                | /             | -0.008       | -11.187      | -0.003    | 11.204                                     | 0.010 |
|                                                  | Bi(1)O <sub>5</sub>          | 1-x, y, 1-z                  | 9.329         | -1.501       | 18.527       | 19.929    | 0.017                                      |       |
|                                                  |                              | x, y, z                      | -9.318        | -1.502       | -18.517      | 19.916    | 0.017                                      |       |
|                                                  |                              | 1/2+x, 1/2+y, z              | -9.323        | -1.503       | -18.523      | 19.923    | 0.017                                      |       |
|                                                  |                              | 1/2-x, 1/2+y, 1-z            | 9.322         | -1.503       | 18.522       | 19.922    | 0.017                                      |       |
|                                                  |                              | $\Sigma$ Bi(1)O <sub>5</sub> | 0.011         | -6.009       | 0.010        | 5.977     | 0.005                                      |       |
|                                                  | Bi(2)O <sub>4</sub>          | 1-x, -1+y, 1-z               | 0.915         | 18.293       | -4.364       | 18.850    | 0.016                                      |       |
|                                                  |                              | x, -1+y, z                   | -0.915        | 18.293       | 4.364        | 18.850    | 0.016                                      |       |
|                                                  |                              | 1/2+x, -1/2+y, z             | -0.915        | 18.293       | 4.364        | 18.850    | 0.016                                      |       |
|                                                  |                              | 1/2-x, -1/2+y, 1-z           | 0.915         | 18.293       | -4.364       | 18.850    | 0.016                                      |       |
|                                                  |                              | $\Sigma$ Bi(2)O <sub>4</sub> | 0.000         | 73.173       | 0.000        | 73.173    | 0.063                                      |       |
|                                                  | Bi(3)O <sub>5</sub>          | 1-x, y, 1-z                  | -3.893        | 8.212        | -12.164      | 14.862    | 0.013                                      |       |
|                                                  |                              | x, y, z                      | 3.891         | 8.210        | 12.165       | 14.861    | 0.013                                      |       |
|                                                  |                              | 1/2+x, 1/2+y, z              | 3.891         | 8.210        | 12.165       | 14.861    | 0.013                                      |       |
|                                                  |                              | 1/2-x, 1/2+y, 1-z            | -3.894        | 8.210        | -12.165      | 14.862    | 0.013                                      |       |
|                                                  |                              | $\Sigma$ Bi(3)O <sub>5</sub> | -0.004        | 32.842       | 0.001        | 32.837    | 0.028                                      |       |
|                                                  | Bi(4)O <sub>6</sub>          | 1-x, -1+y, 1-z               | -0.758        | -7.215       | 13.370       | 15.280    | 0.013                                      |       |
|                                                  |                              | x, -1+y, z                   | 0.758         | -7.213       | -13.370      | 15.279    | 0.013                                      |       |
|                                                  |                              | 1/2+x, -1/2+y, z             | 0.761         | -7.214       | -13.368      | 15.278    | 0.013                                      |       |
|                                                  |                              | 1/2-x, -1/2+y, 1-z           | -0.756        | -7.216       | 13.372       | 15.282    | 0.013                                      |       |
|                                                  |                              | $\Sigma$ Bi(4)O <sub>6</sub> | 0.004         | -28.859      | 0.003        | 28.847    | 0.025                                      |       |
|                                                  | Bi(5)O <sub>5</sub>          | 1-x, y, 1-z                  | 3.271         | -6.099       | 15.107       | 16.310    | 0.014                                      |       |
| x, y, z                                          |                              | -3.271                       | -6.095        | -15.108      | 16.310       | 0.014     |                                            |       |
| 1/2+x, 1/2+y, z                                  |                              | -3.272                       | -6.097        | -15.107      | 16.309       | 0.014     |                                            |       |
| 1/2-x, 1/2+y, 1-z                                |                              | 3.271                        | -6.097        | 15.109       | 16.311       | 0.014     |                                            |       |
|                                                  | $\Sigma$ Bi(5)O <sub>5</sub> | -0.001                       | -24.388       | 0.001        | 24.388       | 0.021     |                                            |       |
|                                                  | $\Sigma$ Bi-O                | /                            | 0.009         | 46.759       | 0.015        | 46.797    | 0.040                                      |       |
|                                                  | Unit cell                    |                              | 0.001         | 35.572       | 0.013        | 35.594    | 0.031                                      |       |

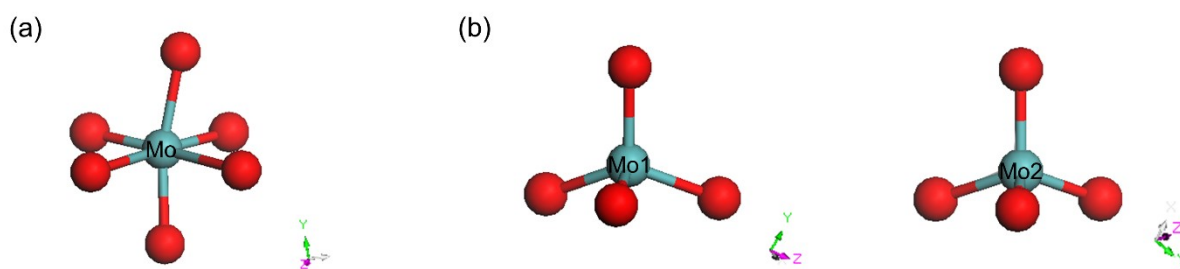

**Figure S1.** The Mo respective coordination polyhedra of  $\gamma\text{-Bi}_2\text{MoO}_6$  (a) and  $\text{Bi}_{10}\text{Mo}_3\text{O}_{24}$  (b).

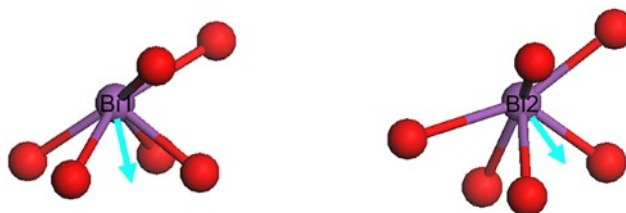

**Figure S2.** The Bi respective coordination polyhedra of  $\gamma\text{-Bi}_2\text{MoO}_6$ , with purple arrows indicating the directions of the group's dipole moments.

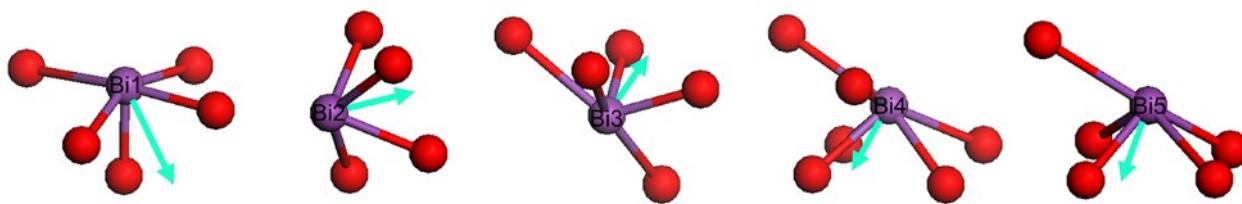

**Figure S3.** The Bi respective coordination polyhedra of  $\text{Bi}_{10}\text{Mo}_3\text{O}_{24}$ , with purple arrows indicating the directions of the group's dipole moments.

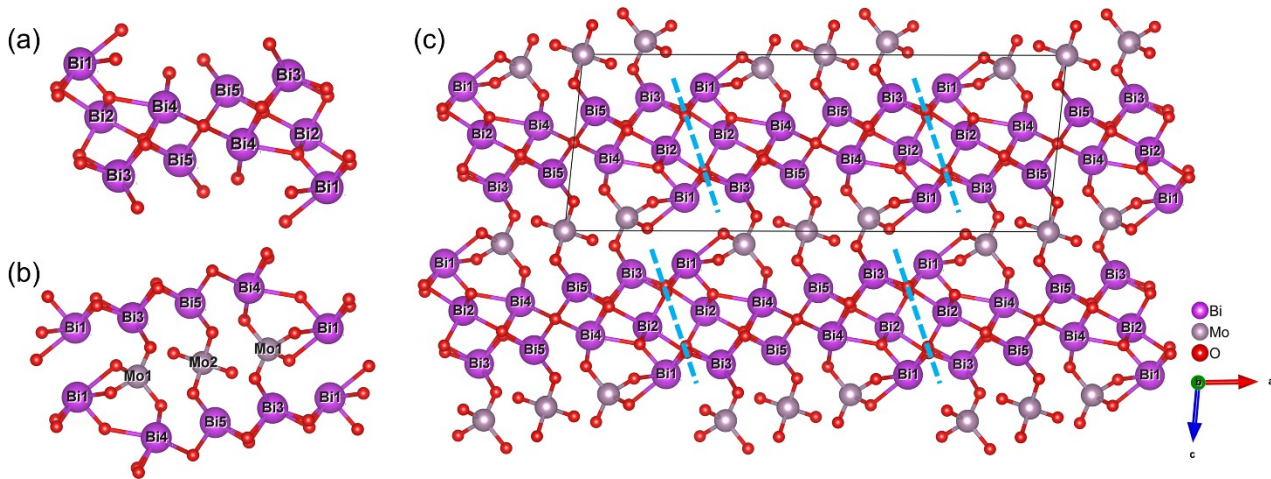

**Figure S4.** The  $[\text{Bi}_{10}\text{O}_{12}]_n$  layer (a). The ten-membered ring channels (b). Projection of  $\text{Bi}_{10}\text{Mo}_3\text{O}_{24}$  crystal structure on to (010) plane (c).

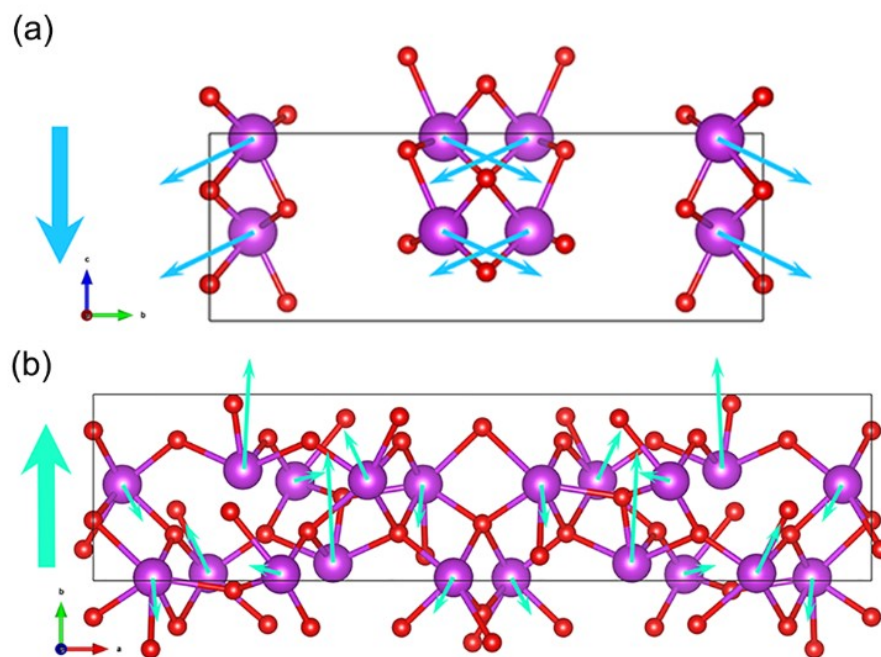

**Figure S5.** The dipole moment directions generated by the asymmetric Bi-O groups in  $\gamma\text{-Bi}_2\text{MoO}_6$  (a) and  $\text{Bi}_{10}\text{Mo}_3\text{O}_{24}$  (b). ( $\gamma\text{-Bi}_2\text{MoO}_6$  is along the c-axis,  $\text{Bi}_{10}\text{Mo}_3\text{O}_{24}$  is along the b-axis.)

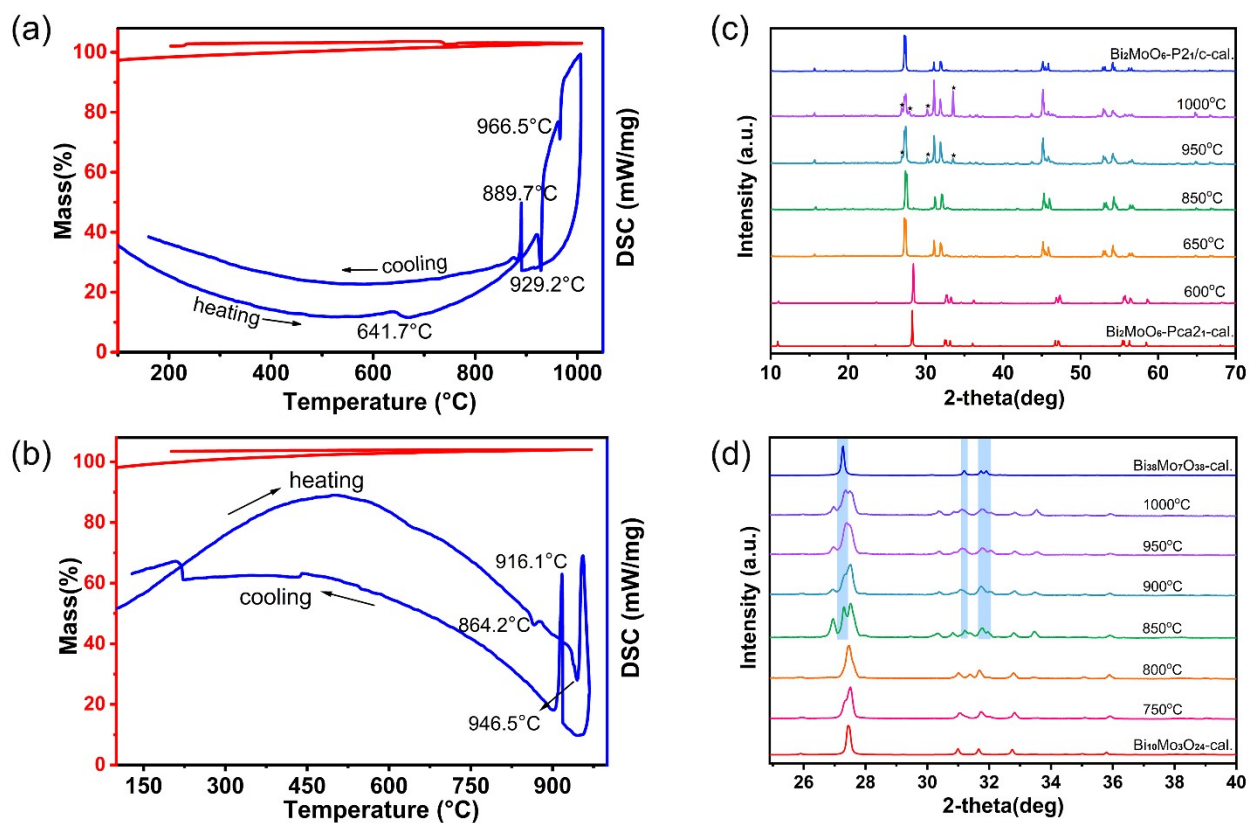

**Figure S6.** The TG-DSC curves of  $\gamma$ - $\text{Bi}_2\text{MoO}_6$  (a) and  $\text{Bi}_{10}\text{Mo}_3\text{O}_{24}$  (c). The XRD patterns of the  $\gamma$ - $\text{Bi}_2\text{MoO}_6$  (b) and  $\text{Bi}_{10}\text{Mo}_3\text{O}_{24}$  (d) samples obtained at different calcination temperatures.



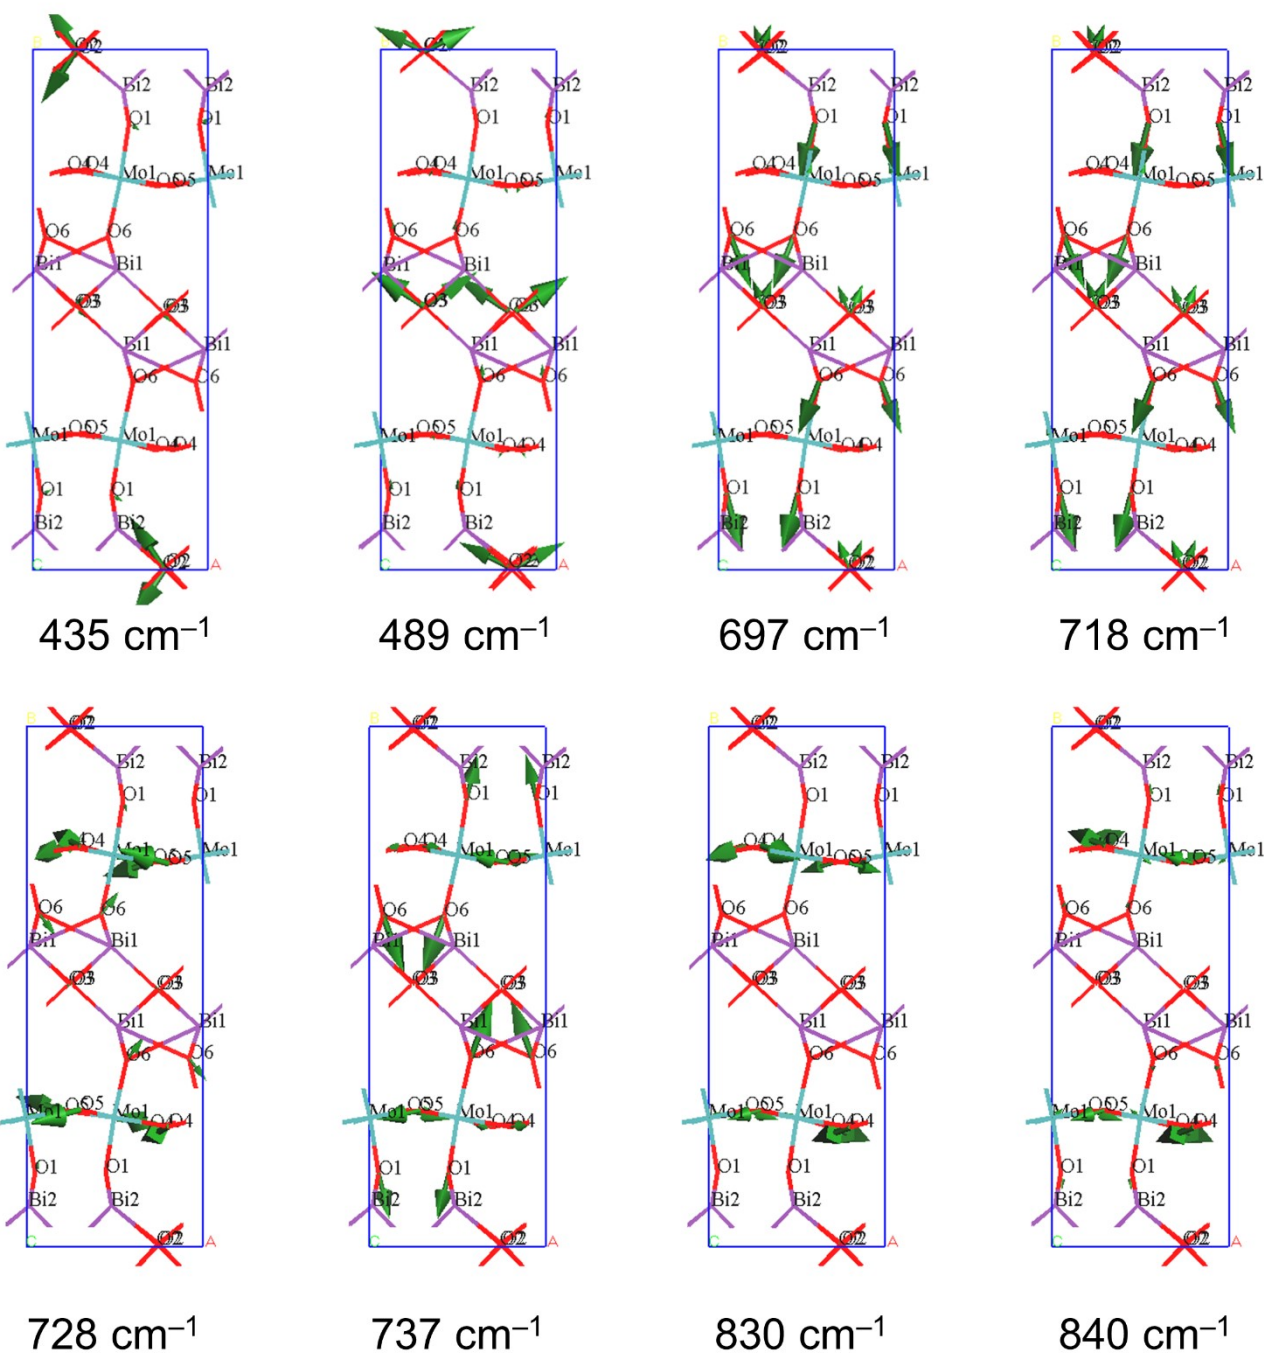

**Figure S7.** The infrared vibration mode of  $\gamma\text{-Bi}_2\text{MoO}_6$ .

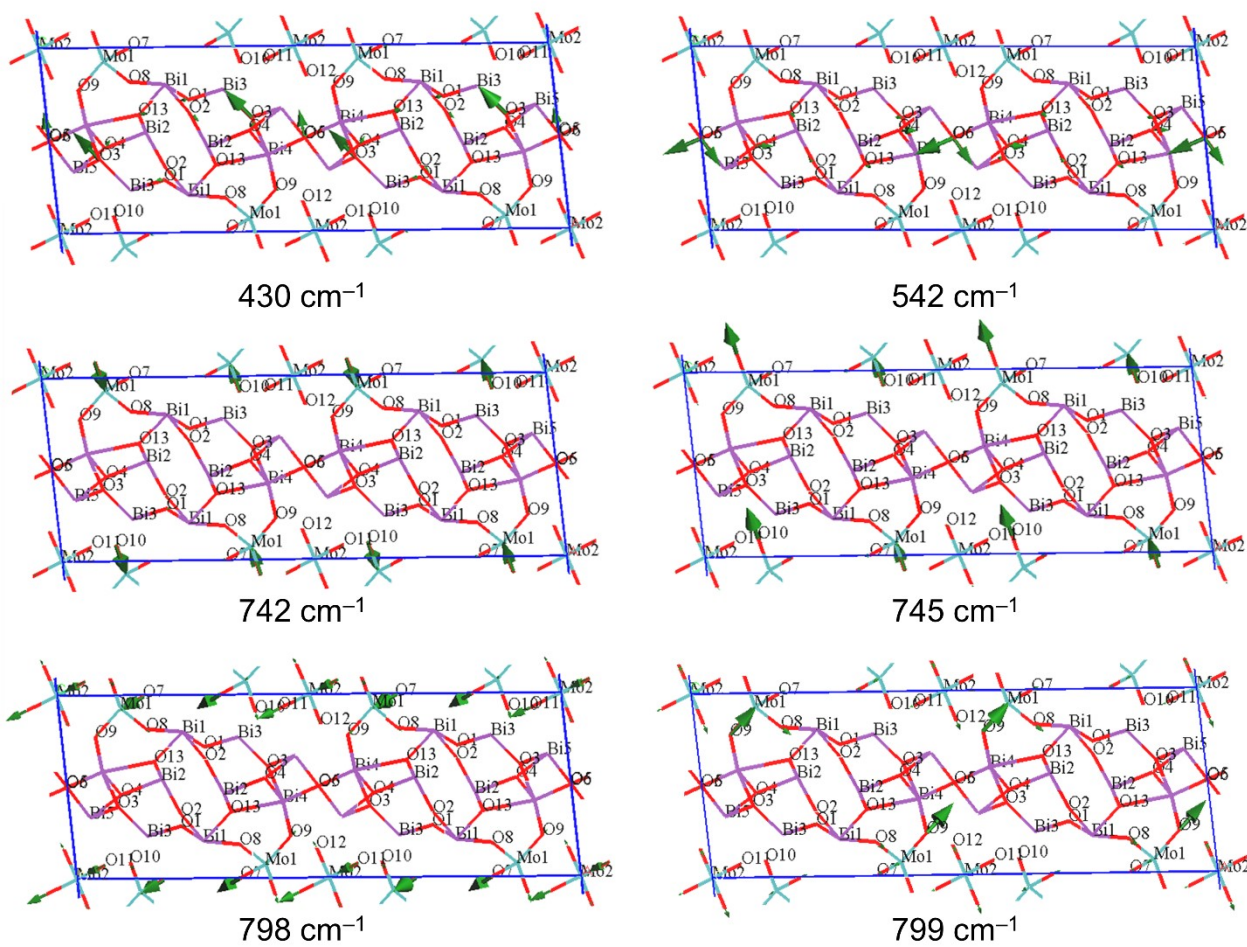

**Figure S8.** The infrared vibration mode of  $\text{Bi}_{10}\text{Mo}_3\text{O}_{24}$ .

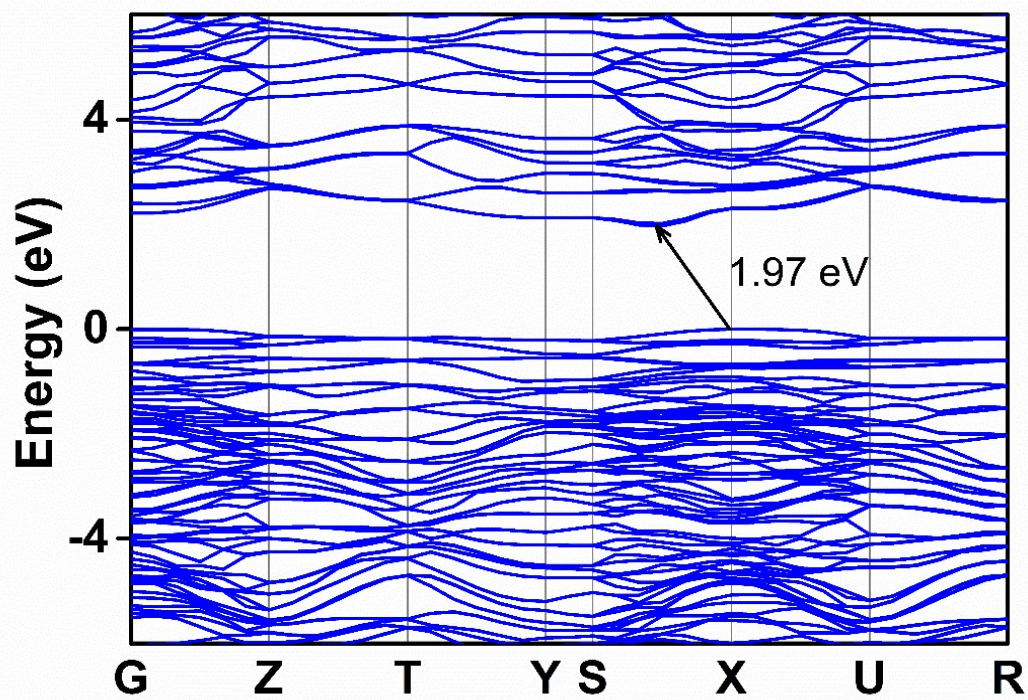

Figure S9. The bandgap of  $\gamma$ - $\text{Bi}_2\text{MoO}_6$  calculated using the HSE06 method.

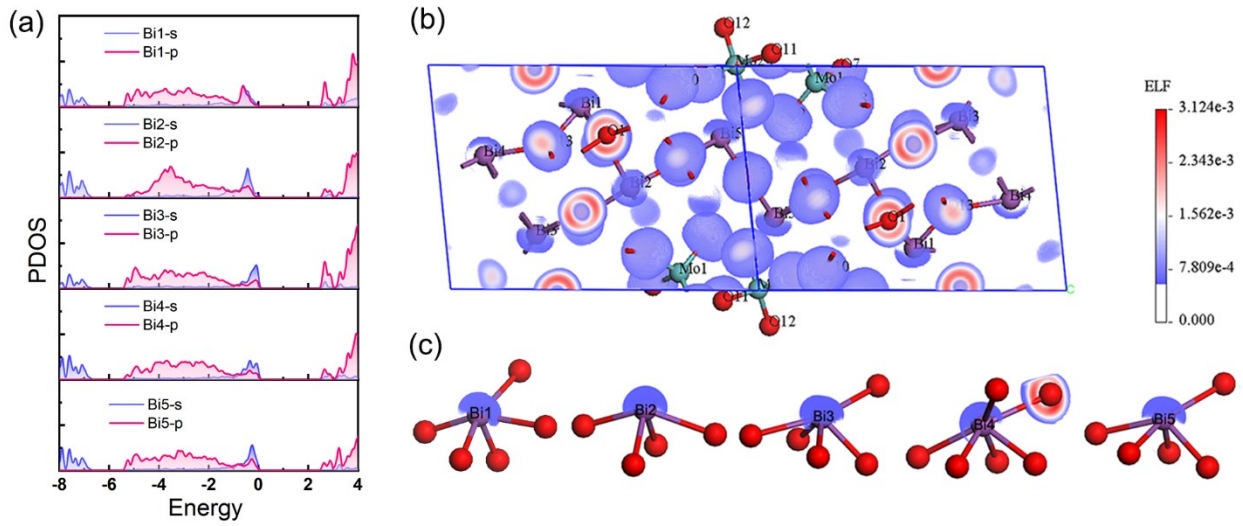

**Figure S10.** Partial DOSs of Bi1-Bi5 atoms from  $\text{Bi}_{10}\text{Mo}_3\text{O}_{24}$  (a). The ELF of  $\text{Bi}_{10}\text{Mo}_3\text{O}_{24}$  (b). The ELF for five independent Bi atoms in  $\text{Bi}_{10}\text{Mo}_3\text{O}_{24}$  (c).

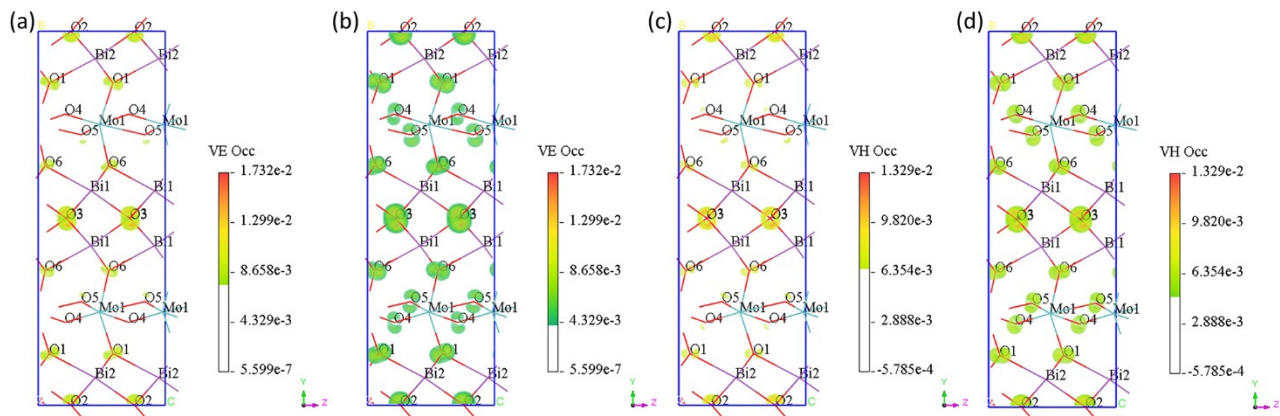

**Figure S11.** SHG density maps of occupied orbitals of the largest SHG coefficient  $d_{24}$  of  $\gamma$ - $\text{Bi}_2\text{MoO}_6$  in different density color scale.

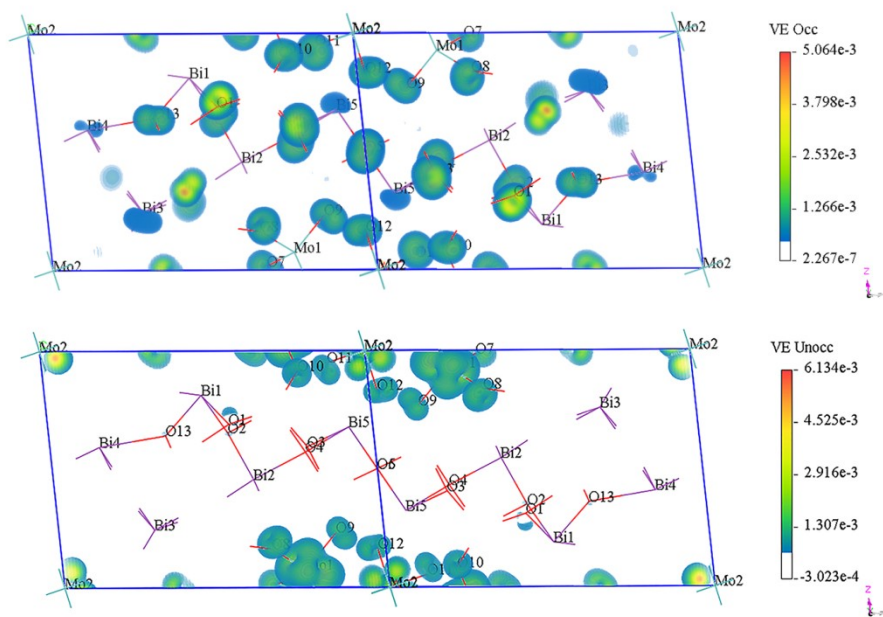

**Figure S12.** SHG density maps of occupied and unoccupied orbitals of the largest SHG coefficient  $d_{22}$  for  $\text{Bi}_{10}\text{Mo}_3\text{O}_{24}$ .
